# Supplementary material for: From Agri-Food Wastes to Polyhydroxyalkanoates through a Sustainable Process
Source: MDPI journal article supplement (doi:10.3390/fermentation8100556), 2022-10-19
Supplement: s1 [file s1]

Archive with 1 entries (1 files):
- fermentation-1975990-supplementary.pdf
