# Supplementary material for: From Agri-Food Wastes to Polyhydroxyalkanoates through a Sustainable Process
Source: MDPI journal article supplement (doi:10.3390/fermentation8100556), 2022-10-19
Supplement: s1 [file s1 › fermentation-1975990-supplementary.pdf]

# From agrifood waste to PHAs through a sustainable process

Federico Verdini <sup>1</sup>, Silvia Tabasso <sup>1\*</sup>, Francesco Mariatti <sup>1</sup>, Francesca Bosco <sup>2</sup>, Chiara Mollea <sup>2</sup>, Emanuela Calcio Gaudino <sup>1</sup>, Alessio Cirio <sup>1</sup>, Giancarlo Cravotto <sup>1\*</sup>

## Supporting information

**Table S1.** Khardenavis' fermentation medium composition.

| Compound                                         | Concentration (g/L) |
|--------------------------------------------------|---------------------|
| CH <sub>3</sub> COOH                             | 20                  |
| (NH <sub>4</sub> ) <sub>2</sub> HPO <sub>4</sub> | 0.754               |
| K <sub>2</sub> HPO <sub>4</sub>                  | 1                   |
| MgSO <sub>4</sub> ·7H <sub>2</sub> O             | 0.4                 |
| Trace elements                                   | 1 mL/L              |
| pH = 7                                           |                     |
| C/N=50                                           | C/P=22.6            |
| Trace elements composition                       |                     |
| Compound                                         | Concentration (g/L) |
| Na <sub>2</sub> SO <sub>4</sub>                  | 25                  |
| FeSO <sub>4</sub> ·7H <sub>2</sub> O             | 25                  |
| MnSO <sub>4</sub> ·4H <sub>2</sub> O             | 4.06                |
| ZnSO <sub>4</sub> ·7H <sub>2</sub> O             | 4.40                |
| CuSO <sub>4</sub> ·5H <sub>2</sub> O             | 0.79                |
| CaCl <sub>2</sub> ·2H <sub>2</sub> O             | 73.4                |

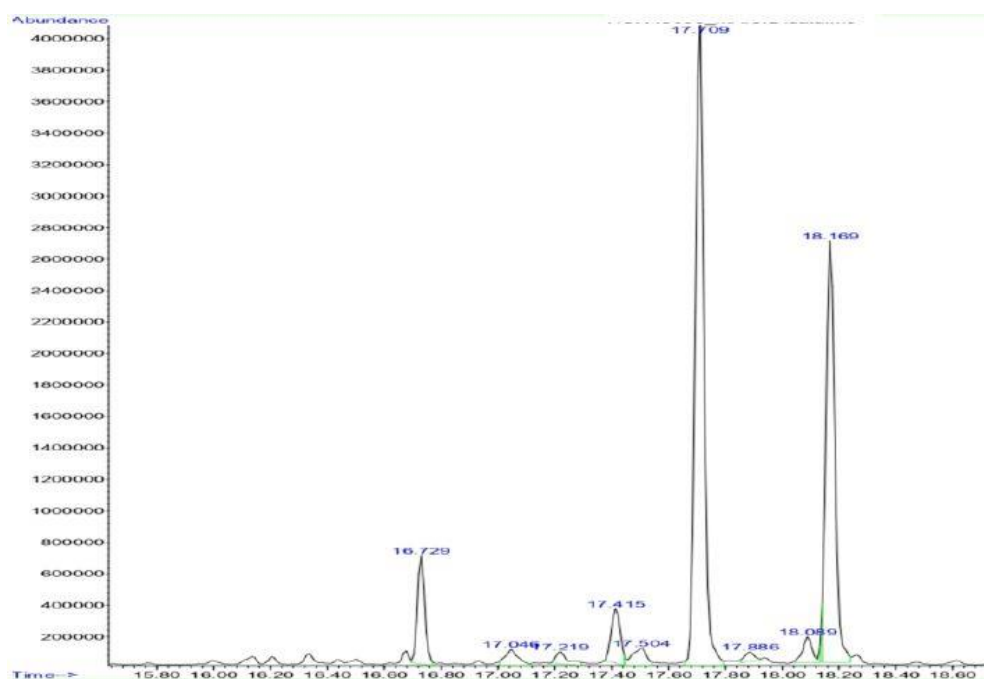

**Figure S1.** GC-MS chromatogram of the reaction performed at 200°C with 0.5 M HCl. (Rt=18.729, Levoglucosan)

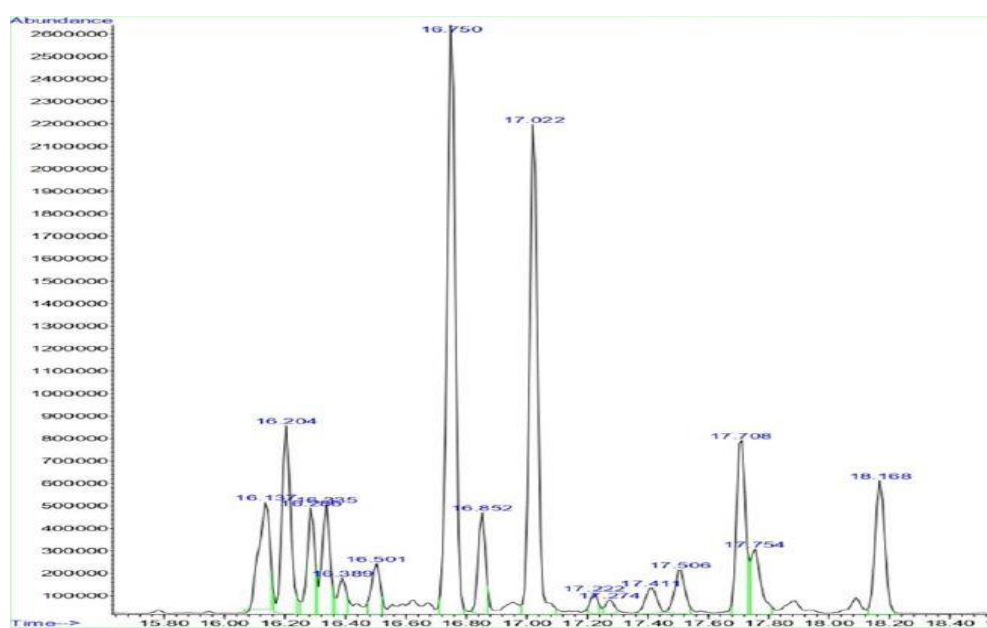

**Figure S2.** GC-MS chromatogram of the reaction performed at 150°C with 0.5 M HCl.

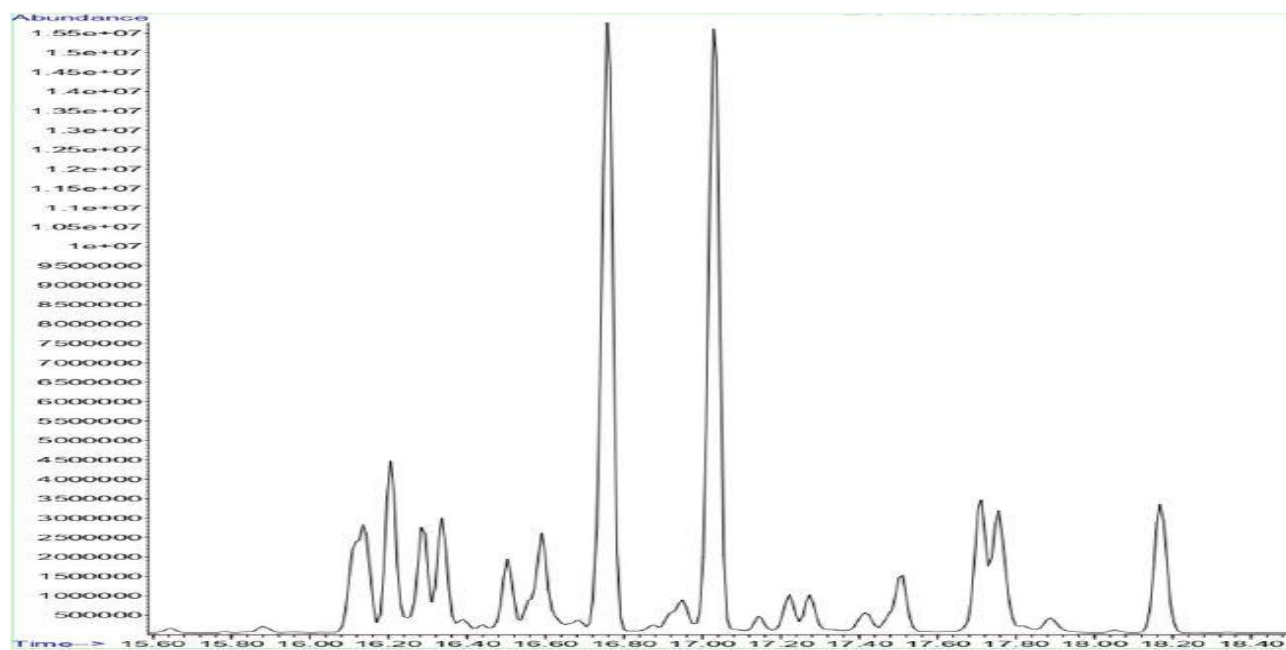

**Figure S3.** GC-MS chromatogram of the reaction performed at 200°C with 0.1 M HCl.

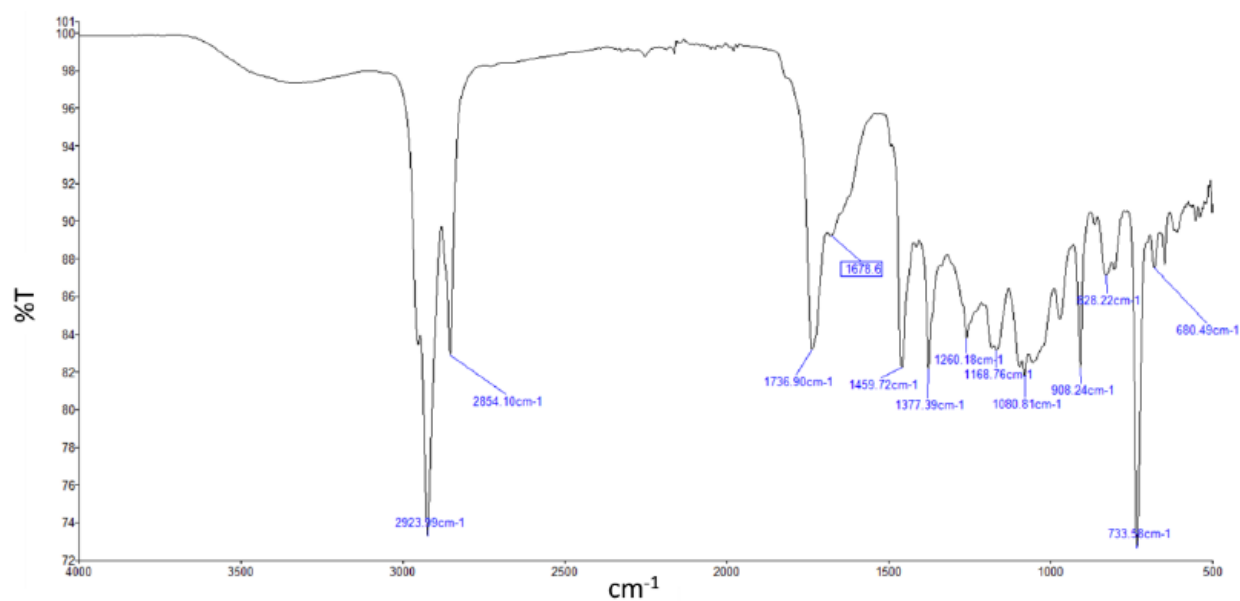

**Figure S4.** FT-IR of the PHA extracted after bioreactor fermentation

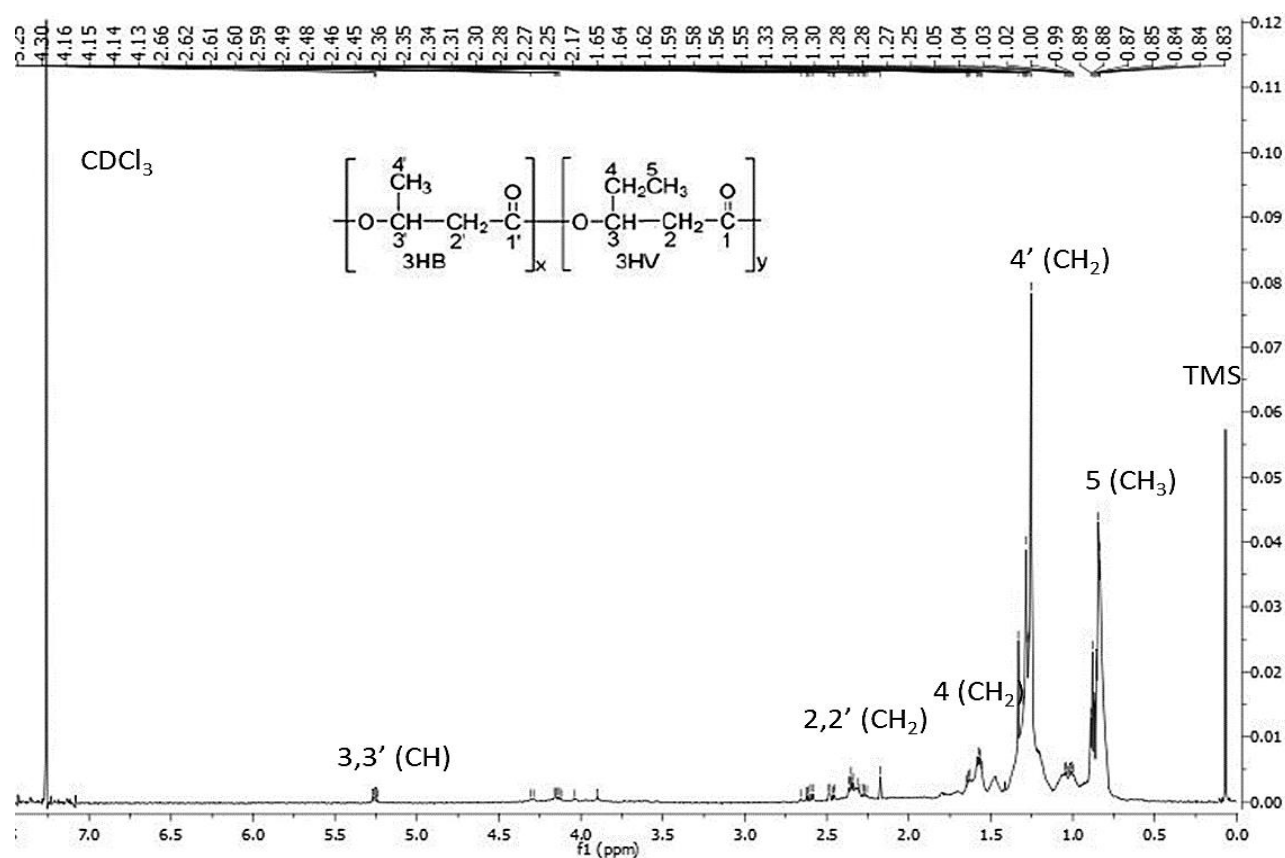

**Figure S5.**  $^1\text{H}$ -NMR of of the PHA extracted after bioreactor fermentation
